# Supplementary material for: Rapid Quantitation of Adulterants in Premium Marine Oils by Raman and IR Spectroscopy: A Data Fusion Approach
Source: Molecules. 2022 Jul 15;27(14):4534. doi: 10.3390/molecules27144534 (PMC9319805; doi:10.3390/molecules27144534)
Supplement: Supplementary file 1 [file molecules-27-04534-s001.zip › molecules-1818058-supplementary.pdf]

# Electronic Supplementary Information for:

## Rapid quantitation of adulterants in premium marine oils by Raman and IR spectroscopy: a data fusion approach

Fatema Ahmmed<sup>1</sup>, Daniel, P. Killeen<sup>2</sup>, Keith C. Gordon<sup>1</sup>, Sara J Fraser-Miller<sup>1\*</sup>

### Contents

|                                                                                                                                                                                                                                                                                                                                  |    |
|----------------------------------------------------------------------------------------------------------------------------------------------------------------------------------------------------------------------------------------------------------------------------------------------------------------------------------|----|
| Table S1. Summary of the sample mixtures used in this study. Samples are expressed as weight percentages (% w/w). Abbreviations: VO = valuable oil; CLO1 to CLO6 = cod liver oil batch; SO1 to SO6 = salmon oil batch; PO = palm oil; O3C = $\omega$ -3 concentrates in ethyl ester; FO = Fish oil; M = model set; T = test set. | 2  |
| Table S2. SVM Model performance for classification of pure (VO: CLOSO) and adulterants (PO, O3C and FO) using Raman, IR and Fused data.                                                                                                                                                                                          | 4  |
| Table S3. SVM model performance with sensitivity and specificity test of pure oil samples (CLO and SO) and adulterants (PO, O3C and FO) using Raman, IR and Fused data.                                                                                                                                                          | 5  |
| Table S4. SVM Model performance for classification of individual pure oil (CLO) and adulterants (PO, O3C and FO) using Raman, IR and Fused data.                                                                                                                                                                                 | 5  |
| Table S5. SVM model performance with accuracy, sensitivity and specificity test of individual pure (CLO) and adulterants (PO, O3C and FO) using Raman, IR and Fused data.                                                                                                                                                        | 6  |
| Table S6. SVM Model performance for classification of individual pure oil samples (SO) and adulterants (PO, O3C and FO) using Raman, IR and Fused data.                                                                                                                                                                          | 6  |
| Table S7. SVM model performance with accuracy, sensitivity and specificity test of pure oil samples (SO) and adulterants (PO, O3C and FO) using Raman, IR and Fused data                                                                                                                                                         | 7  |
| Table S8. The model performance accuracy for PLSR based quantification of PO, O3C and FO oils as oil adulterants in CLO and SO.                                                                                                                                                                                                  | 8  |
| Table S9 Summary table of related literature and the associated key findings.                                                                                                                                                                                                                                                    | 9  |
| Figure S1. PLSR calibration lines and regression coefficients for quantitative prediction of PO concentration in global (a,b); individual CLO(c,d) and SO (e,f) by Raman.                                                                                                                                                        | 13 |
| Figure S2. PLSR calibration lines and regression coefficients for quantitative prediction of O3C concentration in global (a,b); individual CLO (c,d) and SO (e,f) by Raman.                                                                                                                                                      | 13 |
| Figure S3. PLSR calibration lines and regression coefficients for quantitative prediction of FO concentration in global (a,b); individual CLO(c,d) and SO (e,f) by Raman.                                                                                                                                                        | 14 |
| Figure S4. PLSR calibration lines and regression coefficients for quantitative prediction of PO concentration in global (a,b); individual CLO (c,d) and SO (e,f) by IR                                                                                                                                                           | 14 |
| Figure S5. PLSR calibration lines and regression coefficients for quantitative prediction of O3C concentration in global (a,b); individual CLO(c,d) and SO (e,f) by IR.                                                                                                                                                          | 15 |
| Figure S6. PLSR calibration lines and regression coefficients for quantitative prediction of FO concentration in global (a,b); individual CLO(c,d) and SO (e,f) by IR.                                                                                                                                                           | 15 |
| Figure S7. PLSR calibration lines and regression coefficients for quantitative prediction of PO concentration in global (a,b); individual CLO (c,d) and SO (e,f) by Low-level fusion.                                                                                                                                            | 16 |
| Figure S8. PLSR calibration lines and regression coefficients for quantitative prediction of O3C concentration in global (a,b); individual CLO (c,d) and SO (e,f) by Low-level fusion.                                                                                                                                           | 16 |
| Figure S9. PLSR calibration lines and regression coefficients for quantitative prediction of FO concentration in global (a,b); individual CLO (c,d) and SO (e,f) by Low-level fusion.                                                                                                                                            | 17 |

**Table S1.** Summary of the sample mixtures used in this study. Samples are expressed as weight percentages (% w/w). Abbreviations: VO = valuable oil; CLO1 to CLO6 = cod liver oil batch; SO1 to SO6 = salmon oil batch; PO = palm oil; O3C = ω-3 concentrates in ethyl ester; FO = Fish oil; M = model set; T = test set.

| Predominant oil type  | VO (% w/w) | PO (% w/w) | O3C (% w/w) | FO (% w/w) | Batch | Dataset (M or T) | Predominant oil type | VO (% w/w) | PO (% w/w) | O3C (% w/w) | FO (% w/w) | Batch | Dataset (M or T) |
|-----------------------|------------|------------|-------------|------------|-------|------------------|----------------------|------------|------------|-------------|------------|-------|------------------|
| Cod liver oil samples | 100.0      | 0.0        | 0.0         | 0.0        | CLO3  | M                | Salmon oil           | 100.0      | 0.0        | 0.0         | 0.0        | SO2   | M                |
|                       | 93.7       | 0.0        | 0.0         | 6.3        | CLO3  | M                |                      | 95.1       | 0.0        | 0.0         | 4.9        | SO2   | M                |
|                       | 79.0       | 0.0        | 0.0         | 21.0       | CLO3  | M                |                      | 80.1       | 0.0        | 0.0         | 19.9       | SO2   | M                |
|                       | 59.6       | 0.0        | 0.0         | 40.4       | CLO3  | M                |                      | 60.1       | 0.0        | 0.0         | 39.9       | SO2   | M                |
|                       | 97.3       | 0.0        | 2.7         | 0.0        | CLO3  | M                |                      | 94.3       | 0.0        | 5.7         | 0.0        | SO2   | M                |
|                       | 89.7       | 0.0        | 10.3        | 0.0        | CLO3  | M                |                      | 80.0       | 0.0        | 20.0        | 0.0        | SO2   | M                |
|                       | 69.1       | 0.0        | 30.9        | 0.0        | CLO3  | M                |                      | 60.0       | 0.0        | 40.0        | 0.0        | SO2   | M                |
|                       | 50.0       | 0.0        | 50.0        | 0.0        | CLO3  | M                |                      | 99.0       | 1.0        | 0.0         | 0.0        | SO2   | M                |
|                       | 93.8       | 6.2        | 0.0         | 0.0        | CLO3  | M                |                      | 90.1       | 9.9        | 0.0         | 0.0        | SO2   | M                |
|                       | 79.3       | 20.7       | 0.0         | 0.0        | CLO3  | M                |                      | 70.3       | 29.7       | 0.0         | 0.0        | SO2   | M                |
|                       | 59.9       | 40.1       | 0.0         | 0.0        | CLO3  | M                |                      | 50.0       | 50.0       | 0.0         | 0.0        | SO2   | M                |
|                       | 100.0      | 0.0        | 0.0         | 0.0        | CLO4  | M                |                      | 100.0      | 0.0        | 0.0         | 0.0        | SO3   | M                |
|                       | 97.6       | 0.0        | 0.0         | 2.4        | CLO4  | M                |                      | 98.5       | 0.0        | 0.0         | 1.5        | SO3   | M                |
|                       | 89.8       | 0.0        | 0.0         | 10.2       | CLO4  | M                |                      | 90.1       | 0.0        | 0.0         | 9.9        | SO3   | M                |
|                       | 69.6       | 0.0        | 0.0         | 30.4       | CLO4  | M                |                      | 70.1       | 0.0        | 0.0         | 29.9       | SO3   | M                |
|                       | 49.6       | 0.0        | 0.0         | 50.4       | CLO4  | M                |                      | 49.8       | 0.0        | 0.0         | 50.2       | SO3   | M                |
|                       | 94.5       | 0.0        | 5.5         | 0.0        | CLO4  | M                |                      | 98.9       | 0.0        | 1.1         | 0.0        | SO3   | M                |
|                       | 79.9       | 0.0        | 20.1        | 0.0        | CLO4  | M                |                      | 89.8       | 0.0        | 10.2        | 0.0        | SO3   | M                |
|                       | 60.0       | 0.0        | 40.0        | 0.0        | CLO4  | M                |                      | 70.3       | 0.0        | 29.7        | 0.0        | SO3   | M                |
|                       | 97.2       | 2.8        | 0.0         | 0.0        | CLO4  | M                |                      | 50.3       | 0.0        | 49.7        | 0.0        | SO3   | M                |
|                       | 89.4       | 10.6       | 0.0         | 0.0        | CLO4  | M                |                      | 95.0       | 5.0        | 0.0         | 0.0        | SO3   | M                |
|                       | 70.3       | 29.7       | 0.0         | 0.0        | CLO4  | M                |                      | 79.8       | 20.2       | 0.0         | 0.0        | SO3   | M                |
|                       | 49.5       | 50.5       | 0.0         | 0.0        | CLO4  | M                |                      | 60.0       | 40.0       | 0.0         | 0.0        | SO3   | M                |
|                       | 100.0      | 0.0        | 0.0         | 0.0        | CLO6  | M                |                      | 100.0      | 0.0        | 0.0         | 0.0        | SO5   | M                |
|                       | 94.2       | 0.0        | 0.0         | 5.8        | CLO6  | M                |                      | 95.2       | 0.0        | 0.0         | 4.8        | SO5   | M                |
|                       | 79.3       | 0.0        | 0.0         | 20.7       | CLO6  | M                |                      | 80.2       | 0.0        | 0.0         | 19.8       | SO5   | M                |
|                       | 60.0       | 0.0        | 0.0         | 40.0       | CLO6  | M                |                      | 59.9       | 0.0        | 0.0         | 40.1       | SO5   | M                |
|                       | 99.1       | 0.0        | 0.9         | 0.0        | CLO6  | M                |                      | 95.0       | 0.0        | 5.0         | 0.0        | SO5   | M                |
|                       | 89.6       | 0.0        | 10.4        | 0.0        | CLO6  | M                |                      | 80.0       | 0.0        | 20.0        | 0.0        | SO5   | M                |
|                       | 69.8       | 0.0        | 30.2        | 0.0        | CLO6  | M                |                      | 60.0       | 0.0        | 40.0        | 0.0        | SO5   | M                |
|                       | 50.6       | 0.0        | 49.4        | 0.0        | CLO6  | M                |                      | 98.9       | 1.1        | 0.0         | 0.0        | SO5   | M                |
|                       | 93.7       | 6.3        | 0.0         | 0.0        | CLO6  | M                |                      | 89.5       | 10.5       | 0.0         | 0.0        | SO5   | M                |
|                       | 79.8       | 20.2       | 0.0         | 0.0        | CLO6  | M                |                      | 70.3       | 29.7       | 0.0         | 0.0        | SO5   | M                |
|                       | 59.5       | 40.5       | 0.0         | 0.0        | CLO6  | M                |                      | 50.0       | 50.0       | 0.0         | 0.0        | SO5   | M                |
|                       | 100.0      | 0.0        | 0.0         | 0.0        | CLO1  | M                |                      | 100.0      | 0.0        | 0.0         | 0.0        | SO6   | M                |
|                       | 98.5       | 0.0        | 0.0         | 1.5        | CLO1  | M                |                      | 98.8       | 0.0        | 0.0         | 1.2        | SO6   | M                |
|                       | 89.6       | 0.0        | 0.0         | 10.4       | CLO1  | M                |                      | 89.8       | 0.0        | 0.0         | 10.2       | SO6   | M                |
|                       | 69.7       | 0.0        | 0.0         | 30.3       | CLO1  | M                |                      | 69.7       | 0.0        | 0.0         | 30.3       | SO6   | M                |
|                       | 51.2       | 0.0        | 0.0         | 48.8       | CLO1  | M                |                      | 50.3       | 0.0        | 0.0         | 49.7       | SO6   | M                |
|                       | 94.7       | 0.0        | 5.3         | 0.0        | CLO1  | M                |                      | 99.1       | 0.0        | 0.9         | 0.0        | SO6   | M                |
|                       | 89.0       | 0.0        | 11.0        | 0.0        | CLO1  | M                |                      | 89.8       | 0.0        | 10.2        | 0.0        | SO6   | M                |
|                       | 60.6       | 0.0        | 39.4        | 0.0        | CLO1  | M                |                      | 69.9       | 0.0        | 30.1        | 0.0        | SO6   | M                |
|                       | 98.3       | 1.7        | 0.0         | 0.0        | CLO1  | M                |                      | 50.0       | 0.0        | 50.0        | 0.0        | SO6   | M                |
|                       | 89.2       | 10.8       | 0.0         | 0.0        | CLO1  | M                |                      | 94.1       | 5.9        | 0.0         | 0.0        | SO6   | M                |
|                       | 69.9       | 30.1       | 0.0         | 0.0        | CLO1  | M                |                      | 80.2       | 19.8       | 0.0         | 0.0        | SO6   | M                |
|                       | 49.9       | 50.1       | 0.0         | 0.0        | CLO1  | M                |                      | 60.1       | 39.9       | 0.0         | 0.0        | SO6   | M                |
|                       | 100.0      | 0.0        | 0.0         | 0.0        | CLO2  | T                |                      | 100.0      | 0.0        | 0.0         | 0.0        | SO1   | T                |
|                       | 98.4       | 0.0        | 0.0         | 1.6        | CLO2  | T                |                      | 98.8       | 0.0        | 0.0         | 1.2        | SO1   | T                |
|                       | 89.6       | 0.0        | 0.0         | 10.4       | CLO2  | T                |                      | 92.6       | 0.0        | 0.0         | 7.4        | SO1   | T                |
|                       | 74.6       | 0.0        | 0.0         | 25.4       | CLO2  | T                |                      | 74.6       | 0.0        | 0.0         | 25.4       | SO1   | T                |
|                       | 57.6       | 0.0        | 0.0         | 42.4       | CLO2  | T                |                      | 64.6       | 0.0        | 0.0         | 35.4       | SO1   | T                |
|                       | 50.4       | 0.0        | 0.0         | 49.6       | CLO2  | T                |                      | 49.9       | 0.0        | 0.0         | 50.1       | SO1   | T                |
|                       | 98.1       | 0.0        | 1.9         | 0.0        | CLO2  | T                |                      | 98.8       | 0.0        | 1.2         | 0.0        | SO1   | T                |
|                       | 91.8       | 0.0        | 8.2         | 0.0        | CLO2  | T                |                      | 84.7       | 0.0        | 15.3        | 0.0        | SO1   | T                |
|                       | 74.9       | 0.0        | 25.1        | 0.0        | CLO2  | T                |                      | 57.1       | 0.0        | 42.9        | 0.0        | SO1   | T                |
|                       | 65.4       | 0.0        | 34.6        | 0.0        | CLO2  | T                |                      | 49.2       | 0.0        | 50.8        | 0.0        | SO1   | T                |
|                       | 49.7       | 0.0        | 50.3        | 0.0        | CLO2  | T                |                      | 98.2       | 1.8        | 0.0         | 0.0        | SO1   | T                |
|                       | 97.6       | 2.4        | 0.0         | 0.0        | CLO2  | T                |                      | 85.3       | 14.7       | 0.0         | 0.0        | SO1   | T                |

|  |       |      |      |      |      |   |                  |       |       |       |       |     |   |
|--|-------|------|------|------|------|---|------------------|-------|-------|-------|-------|-----|---|
|  | 88.9  | 11.1 | 0.0  | 0.0  | CLO2 | T |                  | 73.3  | 26.7  | 0.0   | 0.0   | SO1 | T |
|  | 74.7  | 25.3 | 0.0  | 0.0  | CLO2 | T |                  | 57.3  | 42.7  | 0.0   | 0.0   | SO1 | T |
|  | 57.1  | 42.9 | 0.0  | 0.0  | CLO2 | T |                  | 50.2  | 49.8  | 0.0   | 0.0   | SO1 | T |
|  | 50.9  | 49.2 | 0.0  | 0.0  | CLO2 | T |                  | 100.0 | 0.0   | 0.0   | 0.0   | SO4 | T |
|  | 100.0 | 0.0  | 0.0  | 0.0  | CLO5 | T |                  | 98.8  | 0.0   | 0.0   | 1.2   | SO4 | T |
|  | 97.6  | 0.0  | 0.0  | 2.4  | CLO5 | T |                  | 85.3  | 0.0   | 0.0   | 14.7  | SO4 | T |
|  | 91.8  | 0.0  | 0.0  | 8.2  | CLO5 | T |                  | 75.2  | 0.0   | 0.0   | 24.8  | SO4 | T |
|  | 74.2  | 0.0  | 0.0  | 25.8 | CLO5 | T |                  | 57.5  | 0.0   | 0.0   | 42.5  | SO4 | T |
|  | 64.5  | 0.0  | 0.0  | 35.5 | CLO5 | T |                  | 50.1  | 0.0   | 0.0   | 49.9  | SO4 | T |
|  | 52.0  | 0.0  | 0.0  | 48.0 | CLO5 | T |                  | 98.8  | 0.0   | 1.2   | 0.0   | SO4 | T |
|  | 98.6  | 0.0  | 1.4  | 0.0  | CLO5 | T |                  | 92.7  | 0.0   | 7.3   | 0.0   | SO4 | T |
|  | 89.3  | 0.0  | 10.7 | 0.0  | CLO5 | T |                  | 75.1  | 0.0   | 24.9  | 0.0   | SO4 | T |
|  | 74.6  | 0.0  | 25.4 | 0.0  | CLO5 | T |                  | 65.0  | 0.0   | 35.0  | 0.0   | SO4 | T |
|  | 57.2  | 0.0  | 42.8 | 0.0  | CLO5 | T |                  | 50.3  | 0.0   | 49.7  | 0.0   | SO4 | T |
|  | 49.5  | 0.0  | 50.5 | 0.0  | CLO5 | T |                  | 98.3  | 1.7   | 0.0   | 0.0   | SO4 | T |
|  | 97.9  | 2.1  | 0.0  | 0.0  | CLO5 | T |                  | 91.6  | 8.4   | 0.0   | 0.0   | SO4 | T |
|  | 91.9  | 8.1  | 0.0  | 0.0  | CLO5 | T |                  | 75.1  | 24.9  | 0.0   | 0.0   | SO4 | T |
|  | 74.9  | 25.1 | 0.0  | 0.0  | CLO5 | T |                  | 64.7  | 35.3  | 0.0   | 0.0   | SO4 | T |
|  | 64.1  | 35.9 | 0.0  | 0.0  | CLO5 | T |                  | 49.9  | 50.1  | 0.0   | 0.0   | SO4 | T |
|  | 50.0  | 50.0 | 0.0  | 0.0  | CLO5 | T |                  | 0.0   | 0.0   | 0.0   | 100.0 | FO  |   |
|  |       |      |      |      |      |   | Pure adulterants | 0.0   | 0.0   | 100.0 | 0.0   | O3C |   |
|  |       |      |      |      |      |   |                  | 0.0   | 100.0 | 0.0   | 0.0   | PO  |   |

**Table S2.** SVM Model performance for classification of pure (VO: CLOSO) and adulterants (PO, O3C and FO) using Raman, IR and Fused data.

| Raman Test set (76% accuracy) |        |       |    |     |    |
|-------------------------------|--------|-------|----|-----|----|
| Confusion matrix              | Actual | 1     | 2  | 3   | 4  |
| Predicted                     |        | CLOSO | PO | O3C | FO |
| 1                             | CLOSO  | 21    | 1  | 0   | 0  |
| 2                             | PO     | 0     | 45 | 3   | 11 |
| 3                             | O3C    | 6     | 6  | 45  | 2  |
| 4                             | FO     | 9     | 3  | 9   | 47 |

  

| IR Test set (82% accuracy) |        |      |    |     |    |
|----------------------------|--------|------|----|-----|----|
| Confusion matrix           | Actual | 1    | 2  | 3   | 4  |
| Predicted                  |        | CLSO | PO | O3C | FO |
| 1                          | CLOSO  | 27   | 3  | 4   | 6  |
| 2                          | PO     | 0    | 47 | 3   | 0  |
| 3                          | O3C    | 0    | 0  | 47  | 0  |
| 4                          | FO     | 9    | 10 | 3   | 54 |

  

| Fused data Test set (85% accuracy) |        |       |    |     |    |
|------------------------------------|--------|-------|----|-----|----|
| Confusion matrix                   | Actual | 1     | 2  | 3   | 4  |
| Predicted                          |        | CLOSO | PO | O3C | FO |
| 1                                  | CLOSO  | 24    | 3  | 4   | 0  |
| 2                                  | PO     | 0     | 49 | 3   | 1  |
| 3                                  | O3C    | 0     | 0  | 46  | 0  |
| 4                                  | FO     | 12    | 5  | 4   | 59 |

**Table S3.** SVM model performance with sensitivity and specificity test of pure oil samples (CLO and SO) and adulterants (PO, O3C and FO) using Raman, IR and Fused data.

| Technique  | Test set                              |    |     |    |                                       |    |     |    |
|------------|---------------------------------------|----|-----|----|---------------------------------------|----|-----|----|
|            | Sensitivity to individual classes (%) |    |     |    | Specificity to individual classes (%) |    |     |    |
|            | CLOSO                                 | PO | O3C | FO | CLOSO                                 | PO | O3C | FO |
| Raman      | 58                                    | 82 | 79  | 78 | 99                                    | 91 | 91  | 86 |
| IR         | 75                                    | 78 | 82  | 90 | 93                                    | 98 | 100 | 86 |
| Fused data | 67                                    | 86 | 82  | 98 | 96                                    | 97 | 100 | 86 |

**Table S4.** SVM Model performance for classification of individual pure oil (CLO) and adulterants (PO, O3C and FO) using Raman, IR and Fused data.

| Raman Test set (81% accuracy)      |        |     |    |     |    |
|------------------------------------|--------|-----|----|-----|----|
| Confusion matrix                   | Actual | 1   | 2  | 3   | 4  |
| Predicted                          |        | CLO | PO | O3C | FO |
| 1                                  | CLO    | 9   | 0  | 0   | 0  |
| 2                                  | PO     | 0   | 26 | 0   | 0  |
| 3                                  | O3C    | 0   | 0  | 23  | 0  |
| 4                                  | FO     | 9   | 4  | 7   | 37 |
| IR Test set (78% accuracy)         |        |     |    |     |    |
| Confusion matrix                   | Actual | 1   | 2  | 3   | 4  |
| Predicted                          |        | CLO | PO | O3C | FO |
| 1                                  | CLO    | 5   | 0  | 1   | 0  |
| 2                                  | PO     | 0   | 23 | 0   | 0  |
| 3                                  | O3C    | 0   | 0  | 26  | 0  |
| 4                                  | FO     | 13  | 7  | 3   | 30 |
| Fused data Test set (74% accuracy) |        |     |    |     |    |
| Confusion matrix                   | Actual | 1   | 2  | 3   | 4  |
| Predicted                          |        | CLO | PO | O3C | FO |
| 1                                  | CLO    | 3   | 0  | 0   | 0  |
| 2                                  | PO     | 0   | 23 | 0   | 0  |
| 3                                  | O3C    | 0   | 0  | 24  | 0  |
| 4                                  | FO     | 15  | 7  | 6   | 30 |

**Table S5.** SVM model performance with accuracy, sensitivity and specificity test of individual pure (CLO) and adulterants (PO, O3C and FO) using Raman, IR and Fused data.

| Technique             | Training set              |                                   |          | Test set                                 |    |     |     |                                          |     |     |    |
|-----------------------|---------------------------|-----------------------------------|----------|------------------------------------------|----|-----|-----|------------------------------------------|-----|-----|----|
|                       | Accuracy<br>(calibration) | Accuracy<br>(cross<br>validation) | Accuracy | Sensitivity to<br>individual classes (%) |    |     |     | Specificity to<br>individual classes (%) |     |     |    |
|                       |                           |                                   |          | CLO                                      | PO | O3C | FO  | CLO                                      | PO  | O3C | FO |
| <b>Raman</b>          | 100                       | 95                                | 81       | 50                                       | 87 | 77  | 100 | 100                                      | 100 | 100 | 74 |
| <b>IR</b>             | 100                       | 99                                | 78       | 28                                       | 77 | 87  | 100 | 99                                       | 100 | 100 | 71 |
| <b>Fused<br/>data</b> | 100                       | 96                                | 74       | 17                                       | 77 | 80  | 100 | 100                                      | 92  | 100 | 64 |

**Table S6.** SVM Model performance for classification of individual pure oil samples (SO) and adulterants (PO, O3C and FO) using Raman, IR and Fused data.

| Raman Test set (66% accuracy)      |        |    |    |     |    |
|------------------------------------|--------|----|----|-----|----|
| Confusion matrix                   | Actual | 1  | 2  | 3   | 4  |
| Predicted                          |        | SO | PO | O3C | FO |
| 1                                  | SO     | 18 | 5  | 1   | 0  |
| 2                                  | PO     | 0  | 24 | 9   | 20 |
| 3                                  | O3C    | 0  | 1  | 17  | 0  |
| 4                                  | FO     | 0  | 0  | 0   | 10 |
| IR Test set (73% accuracy)         |        |    |    |     |    |
| Confusion matrix                   | Actual | 1  | 2  | 3   | 4  |
| Predicted                          |        | SO | PO | O3C | FO |
| 1                                  | SO     | 18 | 0  | 0   | 0  |
| 2                                  | PO     | 4  | 26 | 0   | 0  |
| 3                                  | O3C    | 3  | 3  | 21  | 0  |
| 4                                  | FO     | 18 | 0  | 0   | 12 |
| Fused data Test set (71% accuracy) |        |    |    |     |    |
| Confusion matrix                   | Actual | 1  | 2  | 3   | 4  |
| Predicted                          |        | SO | PO | O3C | FO |
| 1                                  | SO     | 15 | 5  | 0   | 1  |
| 2                                  | PO     | 0  | 19 | 7   | 8  |
| 3                                  | O3C    | 0  | 5  | 20  | 0  |
| 4                                  | FO     | 3  | 1  | 0   | 21 |

**Table S7.** SVM model performance with accuracy, sensitivity and specificity test of pure oil samples (SO) and adulterants (PO, O3C and FO) using Raman, IR and Fused data

| Technique             | Training set              |                                   |          | Test set                                 |    |     |    |                                          |    |     |     |
|-----------------------|---------------------------|-----------------------------------|----------|------------------------------------------|----|-----|----|------------------------------------------|----|-----|-----|
|                       | Accuracy<br>(calibration) | Accuracy<br>(cross<br>validation) | Accuracy | Sensitivity to<br>individual classes (%) |    |     |    | Specificity to<br>individual classes (%) |    |     |     |
|                       |                           |                                   |          | SO                                       | PO | O3C | FO | SO                                       | PO | O3C | FO  |
| <b>Raman</b>          | 100                       | 95                                | 66       | 100                                      | 80 | 63  | 33 | 93                                       | 61 | 99  | 100 |
| <b>IR</b>             | 100                       | 99                                | 73       | 100                                      | 87 | 77  | 40 | 71                                       | 96 | 100 | 100 |
| <b>Fused<br/>data</b> | 100                       | 97                                | 71       | 83                                       | 63 | 77  | 70 | 93                                       | 80 | 194 | 95  |

**Table S8.** The model performance accuracy for PLSR based quantification of PO, O3C and FO oils as oil adulterants in CLO and SO.

| Instrument used                           |             | No. factors | Calibration    |                          | Cross-validation |                           | Prediction (test set) |       |        |                          | Prediction (test set) SVM |       |        |                          |
|-------------------------------------------|-------------|-------------|----------------|--------------------------|------------------|---------------------------|-----------------------|-------|--------|--------------------------|---------------------------|-------|--------|--------------------------|
|                                           |             |             | r <sup>2</sup> | RMSE <sub>C</sub><br>(%) | r <sup>2</sup>   | RMSE <sub>cv</sub><br>(%) | r <sup>2</sup>        | slope | offset | RMSE <sub>P</sub><br>(%) | r <sup>2</sup>            | slope | offset | RMSE <sub>P</sub><br>(%) |
| PO adulterated samples                    |             |             |                |                          |                  |                           |                       |       |        |                          |                           |       |        |                          |
| Raman (model range: 0 to 50 %)            | CLOSO_PO%   | 3           | 0.95           | 4.8                      | 0.94             | 5.9                       | 0.95                  | 0.84  | 2.0    | 4.1                      | 0.95                      | 0.86  | 1.2    | 4.4                      |
|                                           | CLO_PO%     | 1           | 0.98           | 3.4                      | 0.97             | 3.9                       | 0.96                  | 1.0   | -1.3   | 3.5                      | 0.98                      | 0.93  | 1.9    | 2.6                      |
|                                           | SO_PO%      | 2           | 0.93           | 6.4                      | 0.92             | 6.7                       | 0.91                  | 0.76  | 4.2    | 5.6                      | 0.88                      | 0.77  | 4.0    | 5.7                      |
| IR (model range: 0 to 50 %)               | CLOSO_PO%   | 2           | 0.98           | 2.7                      | 0.97             | 4.1                       | 0.92                  | 1.0   | -3.5   | 5.3                      | 0.94                      | 0.99  | -2.4   | 4.6                      |
|                                           | CLO_PO%     | 1           | 0.97           | 3.8                      | 0.97             | 4.5                       | 0.94                  | 1.0   | -1.6   | 4.6                      | 0.96                      | 0.90  | 3.0    | 3.5                      |
|                                           | SO_PO%      | 2           | 0.99           | 1.7                      | 0.99             | 2.4                       | 0.97                  | 1.0   | -1.2   | 3.1                      | 0.96                      | 1.0   | -1.7   | 3.4                      |
| Low-level fusion (model range: 0 to 50 %) | CLOSO_PO%   | 2           | 0.96           | 4.5                      | 0.96             | 4.7                       | 0.95                  | 0.91  | -0.18  | 4.3                      | 0.96                      | 0.84  | 2.1    | 3.9                      |
|                                           | CLO_PO%     | 1           | 0.98           | 3.4                      | 0.97             | 3.9                       | 0.96                  | 1.01  | -1.4   | 3.7                      | 0.98                      | 0.94  | 1.4    | 2.5                      |
|                                           | SO_PO%      | 2           | 0.99           | 2.7                      | 0.99             | 2.9                       | 0.96                  | 0.92  | 1.1    | 3.8                      | 0.95                      | 0.87  | 3.1    | 4.1                      |
| O3C adulterated samples                   |             |             |                |                          |                  |                           |                       |       |        |                          |                           |       |        |                          |
| Raman (model range: 0 to 50 %)            | CLOSO_O3C%  | 2           | 0.96           | 4.5                      | 0.96             | 5.0                       | 0.97                  | 0.91  | 0.22   | 3.2                      | 0.97                      | 0.89  | 0.77   | 3.4                      |
|                                           | CLO _ O3C % | 1           | 0.99           | 2.1                      | 0.99             | 2.2                       | 0.98                  | 0.97  | 1.2    | 2.3                      | 0.99                      | 1.0   | -0.8   | 1.5                      |
|                                           | SO _ O3C %  | 2           | 0.98           | 3.0                      | 0.98             | 3.5                       | 0.98                  | 0.92  | -0.1   | 2.5                      | 0.97                      | 0.89  | 0.94   | 3.4                      |
| IR (model range: 0 to 50 %)               | CLOSO_O3C%  | 1           | 0.95           | 4.4                      | 0.95             | 4.5                       | 0.97                  | 0.92  | 0.2    | 3.2                      | 0.96                      | 0.89  | 1.7    | 3.8                      |
|                                           | CLO _ O3C % | 1           | 0.99           | 1.6                      | 0.99             | 1.9                       | 0.99                  | 0.93  | 0.02   | 3.3                      | 0.99                      | 0.95  | -0.7   | 2.1                      |
|                                           | SO _ O3C %  | 2           | 0.99           | 1.9                      | 0.99             | 2.4                       | 0.99                  | 0.95  | -0.4   | 1.7                      | 0.99                      | 0.95  | -0.6   | 1.6                      |
| Low-level fusion (model range: 0 to 50 %) | CLOSO_O3C%  | 2           | 0.99           | 2.0                      | 0.99             | 2.3                       | 0.99                  | 0.93  | -0.32  | 2.8                      | 0.99                      | 0.92  | 0.10   | 2.4                      |
|                                           | CLO _ O3C % | 1           | 0.99           | 1.6                      | 0.99             | 1.7                       | 0.99                  | 0.95  | 0.54   | 1.6                      | 0.99                      | 0.98  | -0.50  | 1.5                      |
|                                           | SO _ O3C %  | 2           | 0.99           | 2.0                      | 0.99             | 2.5                       | 0.99                  | 0.94  | -0.3   | 1.8                      | 0.99                      | 0.93  | 0.22   | 1.9                      |
| FO adulterated samples                    |             |             |                |                          |                  |                           |                       |       |        |                          |                           |       |        |                          |
| Raman (model range: 0 to 50 %)            | CLOSO_FO%   | 3           | 0.72           | 12.5                     | 0.59             | 15.4                      | 0.75                  | 0.61  | 3.9    | 9.3                      | 0.76                      | 0.59  | 5.3    | 8.6                      |
|                                           | CLO_FO%     | 1           | 0.92           | 6.6                      | 0.91             | 7.7                       | 0.79                  | 0.88  | 5.9    | 8.4                      | 0.64                      | 0.83  | 7.8    | 10.6                     |
|                                           | SO_FO%      | 3           | 0.85           | 9.1                      | 0.45             | 18.0                      | NA                    | 0.69  | -15.6  | 23                       | NA                        | 0.64  | -11.9  | 21.8                     |
| IR (model range: 0 to 50 %)               | CLOSO_FO%   | 2           | 0.67           | 13.4                     | 0.62             | 14.8                      | 0.75                  | 0.65  | 9.3    | 9.4                      | 0.72                      | 0.66  | 8.7    | 9.5                      |
|                                           | CLO_FO%     | 2           | 0.94           | 5.5                      | 0.93             | 6.5                       | 0.88                  | 0.62  | 2.3    | 6.3                      | 0.85                      | 0.96  | -9.9   | 6.9                      |
|                                           | SO_FO%      | 2           | 0.74           | 12.0                     | 0.65             | 14.3                      | 0.88                  | 0.66  | 5.8    | 6.5                      | 0.88                      | 0.69  | 4.9    | 6.2                      |
| Low level fusion (model range: 0 to 50 %) | CLOSO_FO%   | 3           | 0.81           | 10.1                     | 0.75             | 12.0                      | 0.79                  | 0.76  | 5.2    | 8.5                      | 0.77                      | 0.75  | 5.5    | 8.6                      |
|                                           | CLO_FO%     | 2           | 0.94           | 5.9                      | 0.92             | 6.7                       | 0.82                  | 0.89  | 5.2    | 7.9                      | 0.77                      | 0.89  | 5.3    | 8.5                      |
|                                           | SO_FO%      | 2           | 0.78           | 11.0                     | 0.58             | 15.7                      | 0.87                  | 0.71  | 1.3    | 6.9                      | 0.79                      | 0.78  | -1.4   | 8.7                      |

RMSE<sub>C</sub> = Root means square error of calibration, RMSE<sub>cv</sub> = Root means square error of cross-validation and RMSE<sub>P</sub> = Root means square error of prediction.

**Table S9** Summary table of related literature and the associated key findings.

| Application scope       | Samples studied                                                                          | Technique                                        | Objective                                                                                                                                                                    | Main findings                                                                                                                                                                                                                                                                                                                                                            | References |
|-------------------------|------------------------------------------------------------------------------------------|--------------------------------------------------|------------------------------------------------------------------------------------------------------------------------------------------------------------------------------|--------------------------------------------------------------------------------------------------------------------------------------------------------------------------------------------------------------------------------------------------------------------------------------------------------------------------------------------------------------------------|------------|
| Biochemical composition | King salmon, Greenshell muscle                                                           | FT-NIR                                           | Rapid analysis of composition (protein, fat, moisture, carbohydrate and ash)                                                                                                 | <ul style="list-style-type: none"> <li>- FT-NIR model performed well to quantify the moisture, protein and fat content where the coefficient of determination (<math>r^2</math>) and RMSECV value are found more than 0.96 and less than 1.09%, respectively</li> <li>- FT-NIR analysis reported as a suitable method for research and industrial application</li> </ul> | [1]        |
|                         | Pacific oyster ( <i>Crassostrea gigas</i> ), Rock oyster ( <i>Saccostrea glomerata</i> ) | near-infrared IR reflectance spectroscopy (NIRS) | Estimation of composition (protein, moisture, fat and glycogen) in oyster                                                                                                    | <ul style="list-style-type: none"> <li>- NIRS model quantified proximate composition for both Pacific oyster and Rock oyster with high prediction accuracy (<math>r^2 = 0.96, 0.97</math>) and low RPD (4.8, 5.5), respectively</li> </ul>                                                                                                                               | [2]        |
|                         | Freshwater mollusk                                                                       | Confocal Raman microscope (CRS)                  | Identification of mollusks shell composition at microstructure level and determination of relationship between composition and growth                                        | <ul style="list-style-type: none"> <li>- CRS successfully measured the shell growth and confirmed the polymorph of calcium carbonate, aragonite and vaterite distribution in each mollusc shell</li> </ul>                                                                                                                                                               | [3]        |
|                         | Rainbow Trout                                                                            | Raman microscope                                 | -Determination of fatty acid composition in visceral adipose tissue                                                                                                          | <ul style="list-style-type: none"> <li>- Predicted high value for ALA (<math>\alpha</math> -linolenic acid), LA (linoleic acid), EPA and DHA</li> <li>- Developed calibration model to predict PUFAs contents for large scale and high throughput phenotype</li> </ul>                                                                                                   | [4]        |
|                         | Fillet from farmed and wild salmon                                                       | FT-Raman                                         | <ul style="list-style-type: none"> <li>- Identification of carotenoid, collagen and fat in fish muscle</li> <li>- Relative concentration analysis of the compound</li> </ul> | <ul style="list-style-type: none"> <li>- Contained detailed spectral information of the target compounds and relative concentration</li> </ul>                                                                                                                                                                                                                           | [5]        |
|                         | Salmon oil                                                                               | Near-infrared (NIR)                              | - Determination of fatty acid and lipid classes                                                                                                                              | <ul style="list-style-type: none"> <li>- PLS-NIR method quantified several fatty acids, including PUFA, MUFA, omega-3, omega-6, palmitic acid, oleic acid, alpha-linolenic acid</li> <li>- Quantified several lipids classed (free fatty acid, diacylglycerides and triacylglycerides)</li> <li>- RRMSEP <math>\leq 1.41\%</math></li> </ul>                             | [6]        |
|                         | Fish oil                                                                                 | FT-Raman                                         | <ul style="list-style-type: none"> <li>- Quantification of PUFA,</li> <li>- Detection of ethyl ester and lipid oxidation</li> </ul>                                          | <ul style="list-style-type: none"> <li>- Measured successfully the PUFA content directly through capsules</li> <li>- Detected fat oxidation with high sensitivity</li> <li>- Separated oil depending on the PV value</li> </ul>                                                                                                                                          | [7]        |

|                                                          |                                                                                                                                           |                                   |                                                                                                                                                                                                              |                                                                                                                                                                                                                                                                                                                                                                      |      |
|----------------------------------------------------------|-------------------------------------------------------------------------------------------------------------------------------------------|-----------------------------------|--------------------------------------------------------------------------------------------------------------------------------------------------------------------------------------------------------------|----------------------------------------------------------------------------------------------------------------------------------------------------------------------------------------------------------------------------------------------------------------------------------------------------------------------------------------------------------------------|------|
|                                                          | Salmon ( <i>Salmo salar</i> )                                                                                                             | Raman spectroscopy                | <ul style="list-style-type: none"> <li>- Investigation of iodine values,</li> <li>- Characterization of FAs from different sample regimes (ground samples, intact salmon muscle and oil extracts)</li> </ul> | <ul style="list-style-type: none"> <li>- Provided better iodine value predictions</li> <li>- Raman could be a potential method of rapid analysis of fatty acid unsaturation of salmon.</li> </ul>                                                                                                                                                                    | [8]  |
|                                                          | Fish oil capsules                                                                                                                         | FT-IR, NIR and Raman spectroscopy | <ul style="list-style-type: none"> <li>- Investigation of the feasibility of FT-IR, NIR and Raman spectroscopy for quantitative analysis of total omega-3 including EPA and DHA</li> </ul>                   | <ul style="list-style-type: none"> <li>- FT-IR, NIR and Raman spectroscopy combined with PLSR, identified omega-3 including EPA and DHA</li> <li>- NIR spectra provided models with good performances and predicted EPA (<math>r^2 = 0.979</math>, SECV = 2.43%, and SEP = 3.11%) and DHA (<math>r^2 = 0.972</math>, SECV = 2.34%, and SEP = 2.60%)</li> </ul>       | [9]  |
| Classification / detection of adulterant/ authentication | Patin fish oil (PFO)                                                                                                                      | FT-IR                             | <ul style="list-style-type: none"> <li>- Detection of PFO adulterated with palm oil (PO)</li> </ul>                                                                                                          | <ul style="list-style-type: none"> <li>- PLS and PCR model quantified PO adulterant in PFO. RMSEC: 0.77–5.50% RMSEP: 2.07–3.59% <math>R^2</math>: 0.99</li> <li>- Separated pure PFO and PFO adulterated with PO correctly (100%, accuracy)</li> </ul>                                                                                                               | [10] |
|                                                          | Fish oil capsules                                                                                                                         | ATR-FTIR and FT-Raman             | <ul style="list-style-type: none"> <li>- Classification of lipids class as ethyl ester (EE), triglyceride (TAG)</li> </ul>                                                                                   | <ul style="list-style-type: none"> <li>- TAG containing fish oil were clearly separated (100%) from EE containing fish oil</li> <li>- PLS-DA model for FT-IR data predicted better prediction (<math>r^2 = 0.99</math>, lower errors RMSEP = 0.02%) of EE and TAG compared to FT-Raman (<math>r^2 = 0.95</math>, RMSEP = 0.11%)</li> </ul>                           | [11] |
|                                                          | 3 Tuna species: <i>Thunnus albacares</i> , <i>T. obesus</i> <i>Katsuwonus pelamis</i>                                                     | Mid-infrared spectroscopy (MIR)   | <ul style="list-style-type: none"> <li>- Identification of 3 different species of tuna (bigeye, yellowfin and skipjack)</li> <li>- discrimination of various binary mixture of canned tunas</li> </ul>       | <ul style="list-style-type: none"> <li>- calibration model accounted 100% accuracy for skipjack tuna, while misclassification was recorded for bigeye and yellowfin cans</li> <li>- MIR data showed 20 out of 30 commercial tuna cans were mislabelled. The model accounted 90.38% accuracy for validation set</li> </ul>                                            | [12] |
|                                                          | Black carp (n=100), Grass carp (n=100), Silver carp (n=100), Bighead carp (n=100), Common carp (n=80), Crucian (n=100) , and Bream (n=70) | NIR                               | <ul style="list-style-type: none"> <li>- Differentiation of freshwater fish species (Cyprinids)</li> <li>- Evaluation of linear discriminate analysis LDA classification performance</li> </ul>              | <ul style="list-style-type: none"> <li>- Principal component analysis (PCA-LDA) analysis based on MSC preprocessing evaluated the highest (100%) accuracy, specificity, sensitivity, and precision value in the parameters</li> <li>- PCA-LDA and Fast Fourier transformation (FFT-LDA) model showed 100% prediction accuracy for sample classifications.</li> </ul> | [13] |
|                                                          | 90 canned fish in variety of oil                                                                                                          | FT-IR                             | <ul style="list-style-type: none"> <li>- Identification of packing oil authenticity from commercial canned tuna and other fish</li> </ul>                                                                    | <ul style="list-style-type: none"> <li>- PCA analysis clearly classified olive oil from other seed oils except high-oleic sunflower oil (HOSO)</li> <li>- PLS-DA accurately differentiated HOSO from other oils with 100% sensitivity and specificity</li> </ul>                                                                                                     | [14] |

|                               |                                                                                                       |                 |                                                                                                                                  |                                                                                                                                                                                                                                                                                                                                                                                                                   |          |
|-------------------------------|-------------------------------------------------------------------------------------------------------|-----------------|----------------------------------------------------------------------------------------------------------------------------------|-------------------------------------------------------------------------------------------------------------------------------------------------------------------------------------------------------------------------------------------------------------------------------------------------------------------------------------------------------------------------------------------------------------------|----------|
|                               |                                                                                                       |                 |                                                                                                                                  | - PLS-DA also separated EVOO from OO with acceptable prediction value (sensitivity= 93%, specificity= 97%)                                                                                                                                                                                                                                                                                                        |          |
|                               | Red mullet<br>Atlantic mullet<br>Plaice<br>Flounder<br>Atlantic mullet                                | FT-IR and NIR   | - Classification of valuable fish species from cheaper ones<br>- Discrimination between fresh and frozen thawed fillets          | - LDA gave a 100% correct classification,<br>- SIMCA a sensitivity higher than 70% and a specificity of 100% were calculated.                                                                                                                                                                                                                                                                                     | [15]     |
|                               | Cod liver oil (CLO) and vegetable oils (canola, CaO; corn, CO; soybean, SO and walnut, WO)            | FT-IR           | - Detection of vegetable oils adulterant in cod liver oil                                                                        | - Classified cod liver oil sample from CaO, CO, SO and WO<br>- Discriminated pure cod liver oil sample from the adulterated sample<br>- $r^2$ value: 0.99; RMSEC: 0.04-0.82% (v/v) and RMSEP: 1.35-1.75 % (v/v)                                                                                                                                                                                                   | [16, 17] |
|                               | Five (5) fish oil, six (6) lard, five (5) tallow, five (5) chicken oil, and five (5) suet fat samples | FT-IR           | -Classification of different terrestrial animal fats and oils adulteration in fish oil                                           | -PCA analysis showed clear groupings between fish oil, ruminant fat and oils (tallow and suet) and non-ruminant fat and oils (lard and chicken oil)<br>- PLS-DA analysis discriminated adulterated sample (chicken oil, lard, tallow and suet) in fish oil with >95% of the validation accuracy<br>- Detection limits of chicken oil, lard, tallow and suet in fish oil were 0.6%, 0.8%, 2% and 3%, respectively. | [18]     |
| Quality control/<br>freshness | 150 bighead carp                                                                                      | NIRS            | - Determination of freshness in various fish samples                                                                             | - Prediction models (PLSR) of freshness parameter (pH, TBARS, TVB-N, and K) performed well with high ( $r^2 = 0.945, 0.954, 0.932, 0.807$ ) and low error of prediction (RMSEP = 0.081, 0.107, 2.099, 6.509), respectively                                                                                                                                                                                        | [19]     |
|                               | 100 fish oils                                                                                         | FT-NIR<br>FT-IR | -Identification of quality assessment of fish oil<br>-Determination of lipid oxidation by Artificial Neural Networks (ANN) model | -Combined MIR/NIR data yielded the most reliable ANN model for anisidine (AnV) ( $r^2= 0.99$ ; RMSEP = 0.74%) detection<br>- MIR data provided acceptable model for acid value (AV) ( $r^2$ of 0.988 and an RMSEP of 0.43 mg NaOH g <sup>-1</sup> ) detection                                                                                                                                                     | [20]     |
|                               | Rainbow trout fillet (raw and cooked)                                                                 | NIR             | - Investigation of NIR spectroscopy performance for the quality assessment of raw and cooked rainbow trout fillet.               | - NIR spectroscopy classified the samples based on their rearing farm<br>- higher classification accuracy obtained using data fusion approach compare to individual model                                                                                                                                                                                                                                         | [21]     |
|                               | Pacific oysters ( <i>Crassostrea gigas</i> )                                                          | NIR             | - Investigation of the freshness                                                                                                 | - PLS model revealed acceptable coefficient value ( $r^2 = 0.8$ ; ratio of SECV to the error range, RER = 5.37) for days of storage and odour ( $r^2 = 0.77$ , RER = 7.77)                                                                                                                                                                                                                                        | [22]     |

|                                                                 |                                                                            |                     |                                                                                                                                                         |                                                                                                                                                                                                                                                                                                                                                                                                    |      |
|-----------------------------------------------------------------|----------------------------------------------------------------------------|---------------------|---------------------------------------------------------------------------------------------------------------------------------------------------------|----------------------------------------------------------------------------------------------------------------------------------------------------------------------------------------------------------------------------------------------------------------------------------------------------------------------------------------------------------------------------------------------------|------|
|                                                                 |                                                                            |                     |                                                                                                                                                         | - indicated storage time (sample odor) as (good indicators of freshness than its color                                                                                                                                                                                                                                                                                                             |      |
|                                                                 | Chub mackerel ( <i>Scomber japonicus</i> )                                 | NIR                 | - Determination of freshness under different storage temperature                                                                                        | - The samples prepared at 3-Kda ultrafiltrated fraction showed spectral features at 1,379.3 to 1,388.9 nm, involving spectral differences with changes in the storage period.<br>- PLSR model showed greater correlation with coefficient ( $r^2 = 0.98$ ) for the NIR data and ( $r^2 = 0.99$ ) for high-performance liquid chromatography (HPLC) data, with cadaverine contents.                 | [23] |
| Structural analysis of chemical constituents in marine products | Teleostean fish (chorion /eggshell)                                        | FT-Raman, ATR-IR    | - Investigation of the secondary structure features of chorion proteins                                                                                 | - FT-Raman and ATR-IR spectroscopy evaluated the secondary structure of chorion proteins by confirming the abundance of antiparallel $\beta$ -pleated sheet in eggshell proteins                                                                                                                                                                                                                   | [24] |
|                                                                 | Tilapia ( <i>Oreochromis niloticus</i> )                                   | FT-IR, Raman        | - Investigation of the effect of comminution conditions on the structure of fish protein paste and gels made from surimi and fish protein isolate (FPI) | - Both spectroscopic analysis results found higher degree of unfolding protein structure in FPI and surimi chopped at high temperature (25 <sup>0</sup> C) for long time (18 min) compared to low temperature (5 <sup>0</sup> C) in a short time (6 min)                                                                                                                                           | [25] |
|                                                                 | Lean fish: hake fillets                                                    | - FT-IR<br>FT-Raman | - Characterization of lipids class<br>- Investigation of lipids oxidation during frozen storage                                                         | - FT-IR data showed significant intensity variation in carbonyl band from $1712.14 \pm 0.68 \text{ cm}^{-1}$ to $1710.75 \pm 0.20 \text{ cm}^{-1}$ during frozen storage at -10 <sup>o</sup> C within 5 - 20 weeks, indicating lipid hydrolysis<br>- Lipid oxidation was identified by Raman analysis at the band shifting of $1658 \text{ cm}^{-1}$ , attributed to conjugated dienes development | [26] |
|                                                                 | Six different species: sixty-four (64) fish                                | - Raman microscopy  | - Investigation the species discrimination and quality assessment of fish freshness under various freezing/thawing condition                            | - PCA model enabled to cluster three different batches of samples and determined freshness of the samples<br>- In case of horse mackerel samples, noticeable changes found between fresh and twice-frozen-thawed samples. The reduction of Raman band intensity indicated the alteration of lipid structure.                                                                                       | [27] |
|                                                                 | Seabream fillets (5 experimental treatments: 0,1,3,5,7 freeze- thaw cycle) | Raman               | -Evaluation of alteration of protein structure, water-protein interaction and physiological properties                                                  | -Raman spectral analysis indicated the alteration of secondary protein structure gradually during multiple freeze-thaw cycles                                                                                                                                                                                                                                                                      | [28] |

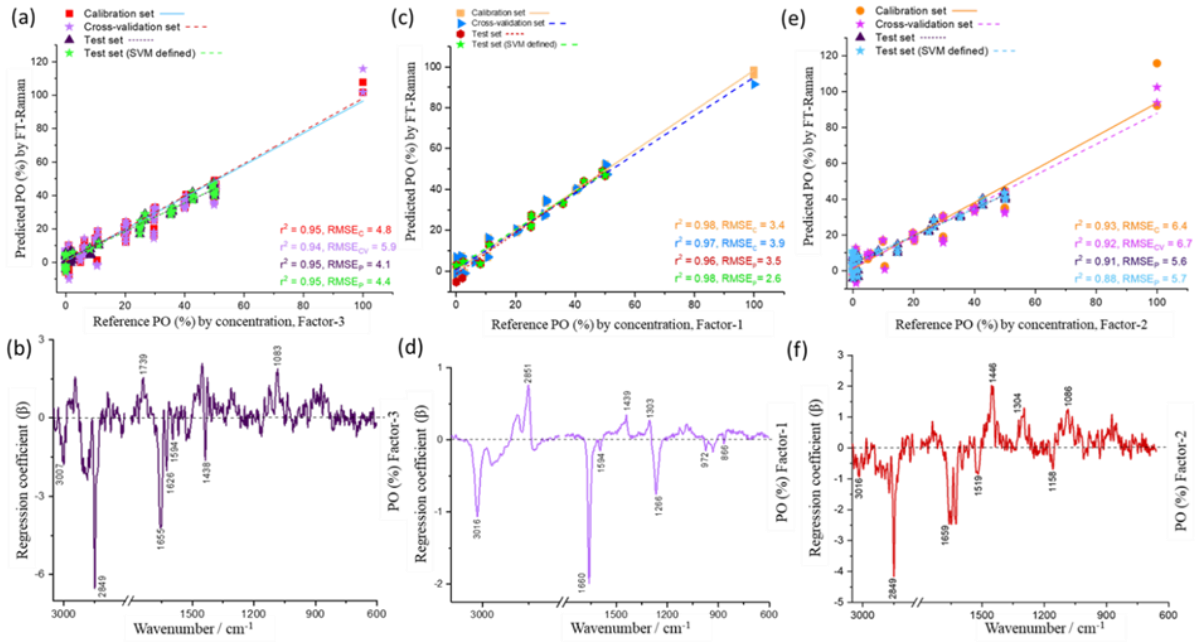

**Figure S1.** PLSR calibration lines and regression coefficients for quantitative prediction of PO concentration in global (a,b); individual CLO(c,d) and SO (e,f) by Raman.

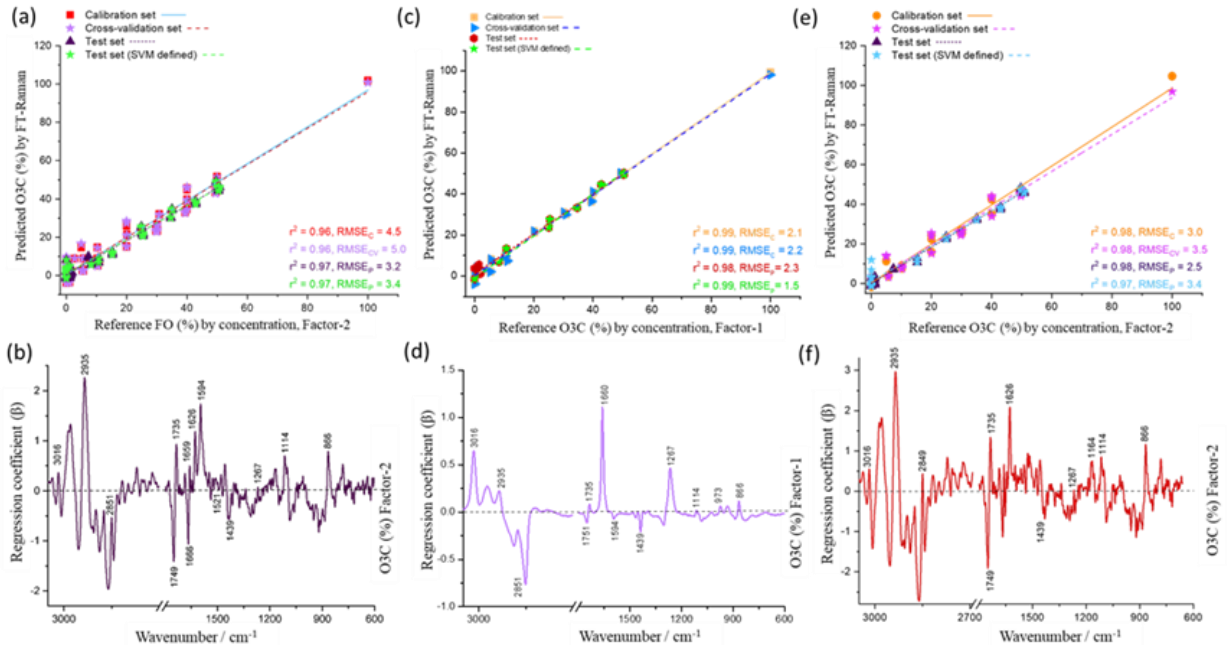

**Figure S2.** PLSR calibration lines and regression coefficients for quantitative prediction of O3C concentration in global (a,b); individual CLO (c,d) and SO (e,f) by Raman.

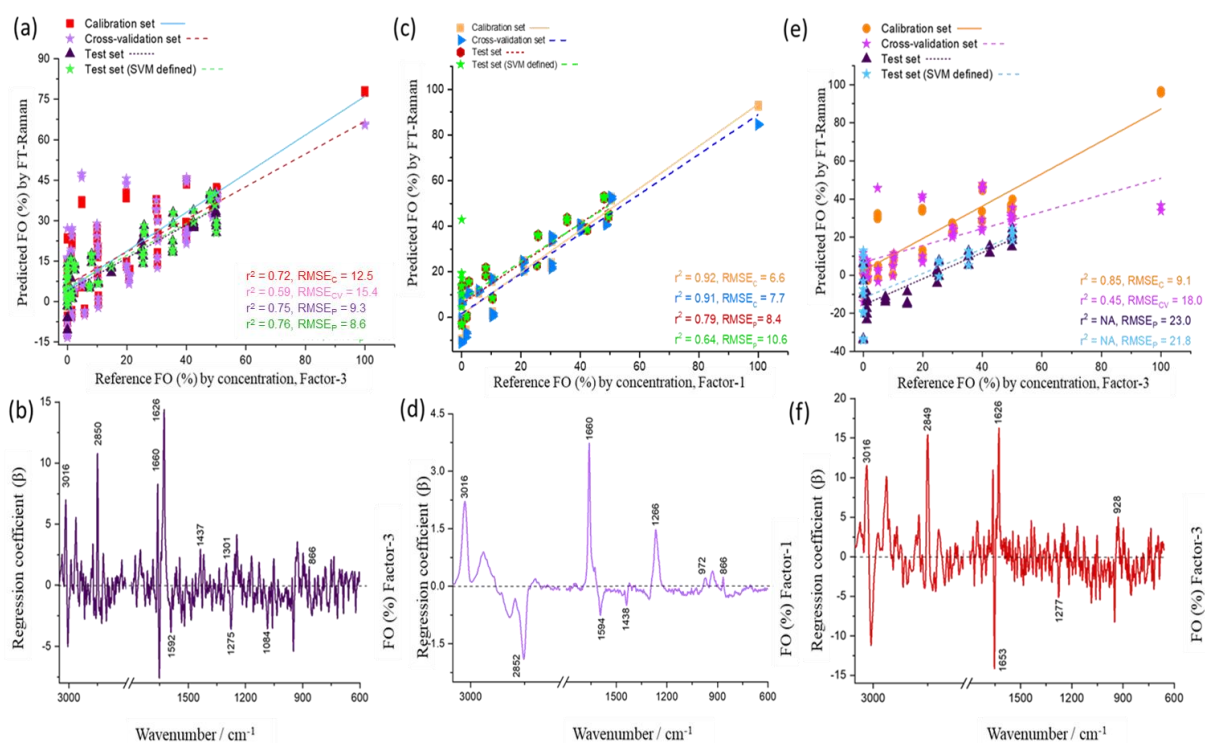

**Figure S3.** PLSR calibration lines and regression coefficients for quantitative prediction of FO concentration in global (a,b); individual CLO(c,d) and SO (e,f) by Raman.

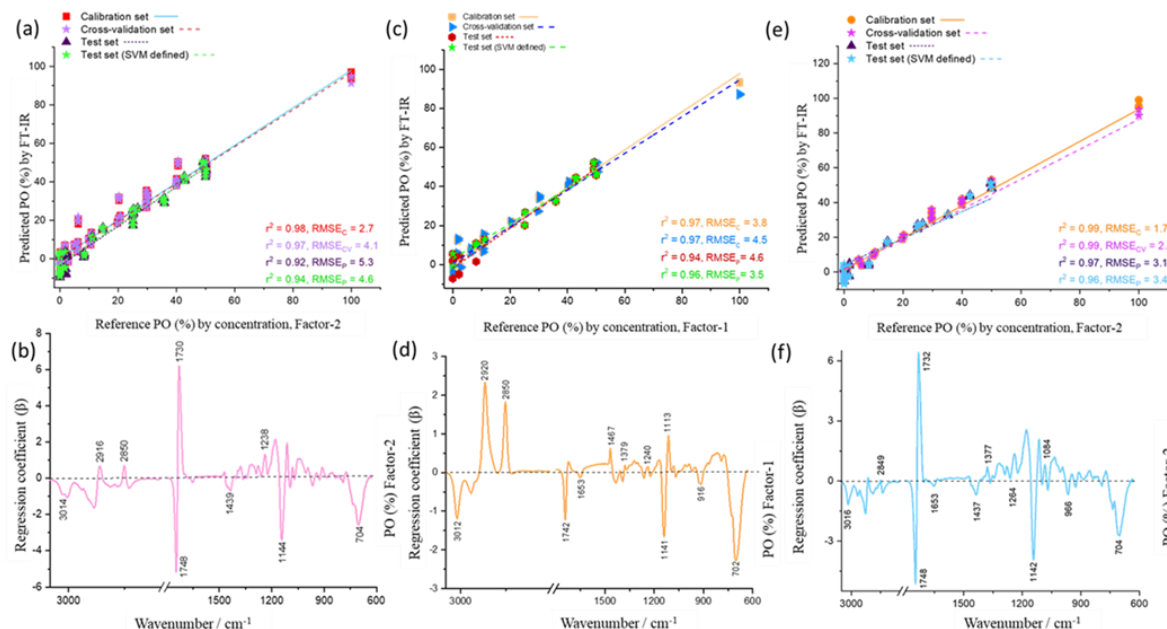

**Figure S4.** PLSR calibration lines and regression coefficients for quantitative prediction of PO concentration in global (a,b); individual CLO (c,d) and SO (e,f) by IR

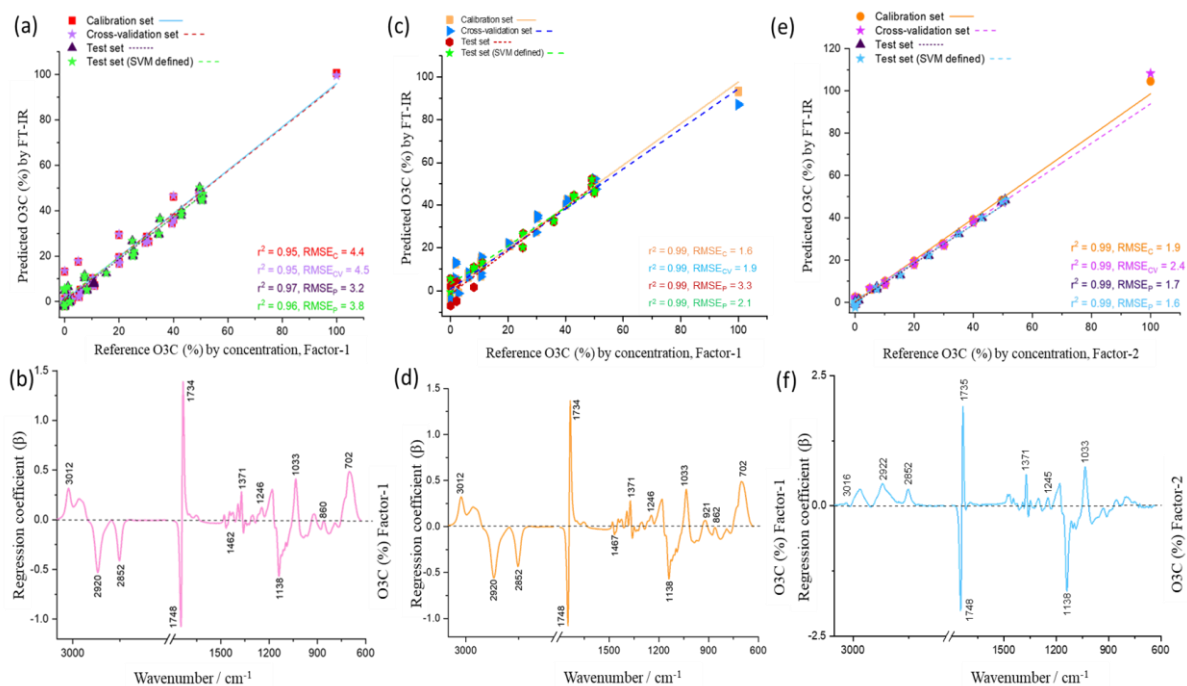

**Figure S5.** PLSR calibration lines and regression coefficients for quantitative prediction of O3C concentration in global (a,b); individual CLO(c,d) and SO (e,f) by IR.

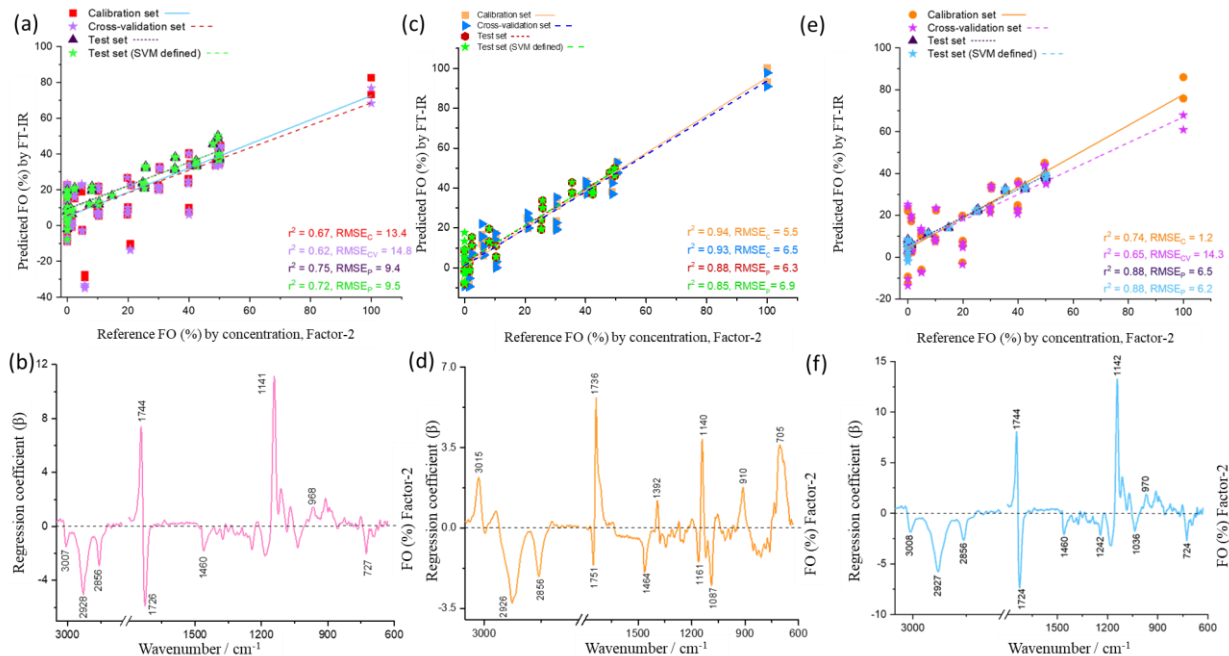

**Figure S6.** PLSR calibration lines and regression coefficients for quantitative prediction of FO concentration in global (a,b); individual CLO(c,d) and SO (e,f) by IR.

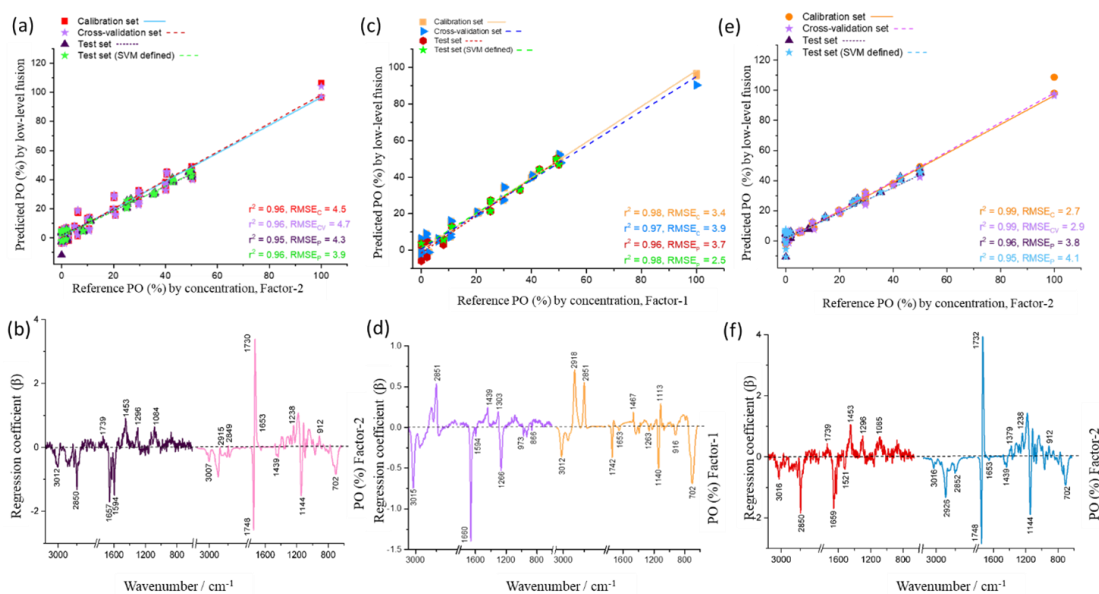

**Figure S7.** PLSR calibration lines and regression coefficients for quantitative prediction of PO concentration in global (a,b); individual CLO (c,d) and SO (e,f) by Low-level fusion.

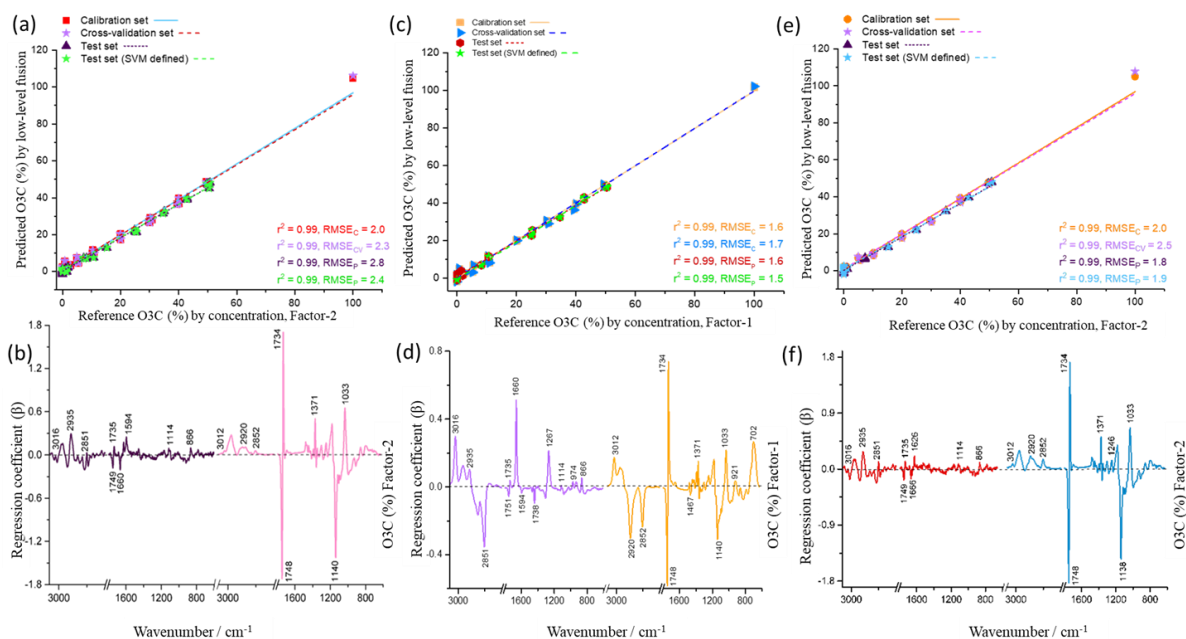

**Figure S8.** PLSR calibration lines and regression coefficients for quantitative prediction of O3C concentration in global (a,b); individual CLO (c,d) and SO (e,f) by Low-level fusion.

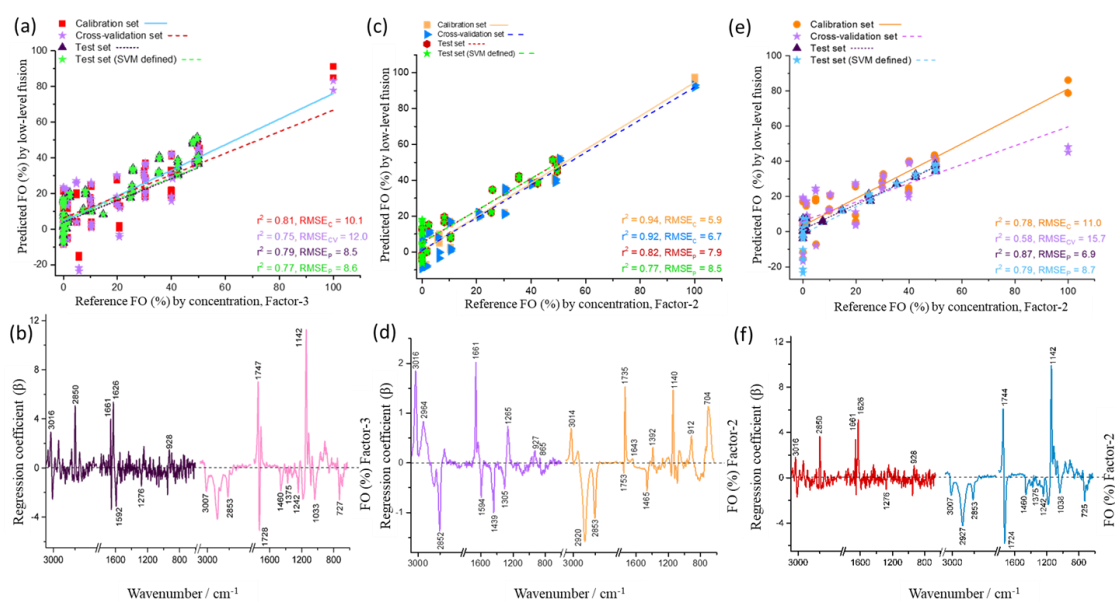

**Figure S9.** PLSR calibration lines and regression coefficients for quantitative prediction of FO concentration in global (a,b) ;individual CLO (c,d) and SO (e,f) by Low-level fusion.

## References

1. Miller, M.R., et al., *Application of a Fourier transform—near infrared reflectance spectroscopy method for the rapid proximate analysis of the greenshell mussel (Perna canaliculus) and king (Chinook) salmon (Oncorhynchus tshawytscha)*. Aquaculture Research, 2019. **50**(6): p. 1668-1677.
2. Brown, M.R., et al., *Application of Near-Infrared Reflectance Spectroscopy for the Rapid Chemical Analysis of Sydney Rock Oyster (Saccostrea Glomerata) and Pacific Oyster (Crassostrea gigas)*. Journal of Shellfish Research, 2012. **31**(4): p. 1051-1060.
3. Sarabia, G.M. and B. Sharma, *Non-destructive raman spectroscopic determination of freshwater mollusk composition, growth, and damage repair*. Analyst, 2021. **146**(20): p. 6288-6296.
4. Prado, E., et al., *Prediction of fatty acids composition in the rainbow trout Oncorhynchus mykiss by using Raman micro-spectroscopy*. Analytica Chimica Acta, 2021: p. 339212.
5. Marquardt, B.J. and J.P. Wold, *Raman analysis of fish: a potential method for rapid quality screening*. LWT-Food Science and Technology, 2004. **37**(1): p. 1-8.
6. Cascant, M.M., et al., *Determination of fatty acids and lipid classes in salmon oil by near infrared spectroscopy*. Food chemistry, 2018. **239**: p. 865-871.
7. Killeen, D.P., et al., *Raman spectroscopy of fish oil capsules: polyunsaturated fatty acid quantitation plus detection of ethyl esters and oxidation*. Journal of agricultural and food chemistry, 2017. **65**(17): p. 3551-3558.
8. Afseth, N.K., J.P. Wold, and V.H. Segtnan, *The potential of Raman spectroscopy for characterisation of the fatty acid unsaturation of salmon*. Analytica Chimica Acta, 2006. **572**(1): p. 85-92.
9. Bekhit, M.Y., B. Grung, and S.A. Mjøs, *Determination of omega-3 fatty acids in fish oil supplements using vibrational spectroscopy and chemometric methods*. Applied spectroscopy, 2014. **68**(10): p. 1190-1200.
10. Putri, A.R., A. Rohman, and S. RIYANTO, *Authentication of patin (Pangasius micronemus) fish oil adulterated with palm oil using FTIR spectroscopy combined with chemometrics*. International Journal of Applied Pharmaceutics, 2019: p. 195-199.
11. Amorim, T.L., et al., *ATR-FTIR and Raman Spectroscopies Associated with Chemometrics for Lipid Form Evaluation of Fish Oil Supplements: A Comparative Study*. ACS Food Science & Technology, 2021. **1**(3): p. 318-325.
12. Boughattas, F., B. Le Fur, and R. Karoui, *Mid infrared spectroscopy coupled with chemometric tools for qualitative analysis of canned tuna with sunflower medium*. Journal of Food Composition and Analysis, 2020. **91**: p. 103519.
13. Lv, H., et al., *Classification of freshwater fish species by linear discriminant analysis based on near infrared reflectance spectroscopy*. Journal of Near Infrared Spectroscopy, 2017. **25**(1): p. 54-62.
14. Dominguez-Vidal, A., et al., *Authentication of canned fish packing oils by means of Fourier transform infrared spectroscopy*. Food Chemistry, 2016. **190**: p. 122-127.
15. Alamprese, C. and E. Casiraghi, *Application of FT-NIR and FT-IR spectroscopy to fish fillet authentication*. LWT-Food Science and Technology, 2015. **63**(1): p. 720-725.
16. Rohman, A. and Y.B. Che Man, *Analysis of cod-liver oil adulteration using Fourier transform infrared (FTIR) spectroscopy*. Journal of the American Oil Chemists' Society, 2009. **86**(12): p. 1149.
17. Rohman, A. and Y.B. Che Man, *Application of Fourier transform infrared (FT-IR) spectroscopy combined with chemometrics for authentication of cod-liver oil*. Vibrational Spectroscopy, 2011. **55**(2): p. 141-145.
18. Lingzhi, X., et al., *Discriminant analysis of terrestrial animal fat and oil adulteration in fish oil by infrared spectroscopy*. International Journal of Agricultural and Biological Engineering, 2016. **9**(3): p. 179-185.
19. Zhou, J., et al., *Evaluation of freshness in freshwater fish based on near infrared reflectance spectroscopy and chemometrics*. Lwt, 2019. **106**: p. 145-150.
20. Giese, E., et al., *Determining quality parameters of fish oils by means of <sup>1</sup>H nuclear magnetic resonance, mid-infrared, and near-infrared spectroscopy in combination with multivariate statistics*. Food Research International, 2018. **106**: p. 116-128.
21. Dalle Zotte, A., et al., *Authentication of raw and cooked freeze-dried rainbow trout (Oncorhynchus mykiss) by means of near infrared spectroscopy and data fusion*. Food Research International, 2014. **60**: p. 180-188.
22. Madigan, T., et al., *The use of rapid instrumental methods to assess freshness of half shell Pacific oysters, Crassostrea gigas: A feasibility study*. Innovative Food Science & Emerging Technologies, 2013. **19**: p. 204-209.
23. Shim, K. and Y. Jeong, *Freshness Evaluation in Chub Mackerel (Scomber japonicus) Using Near-Infrared Spectroscopy Determination of the Cadaverine Content*. Journal of Food Protection, 2019. **82**(5): p. 768-774.
24. Ionomidou, V.A., et al., *Secondary structure of chorion proteins of the teleostean fish Dentex dentex by ATR FT-IR and FT-Raman spectroscopy*. Journal of structural biology, 2000. **132**(2): p. 112-22.
25. Kobayashi, Y., S.G. Mayer, and J.W. Park, *FT-IR and Raman spectroscopies determine structural changes of tilapia fish protein isolate and surimi under different comminution conditions*. Food Chemistry, 2017. **226**: p. 156-164.
26. Sanchez-Alonso, I., P. Carmona, and M. Careche, *Vibrational spectroscopic analysis of hake (Merluccius merluccius L.) lipids during frozen storage*. Food Chemistry, 2012. **132**(1): p. 160-167.
27. Velioglu, H.M., H.T. Temiz, and I.H. Boyaci, *Differentiation of fresh and frozen-thawed fish samples using Raman spectroscopy coupled with chemometric analysis*. Food Chemistry, 2015. **172**: p. 283-90.
28. Cao, M., et al., *The impact of recrystallisation on the freeze-thaw cycles of red seabream (Pagrus major) fillets*. International Journal of Food Science & Technology, 2018. **54**(5): p. 1642-1650.
